# Supplementary material for: Real-time measurement of the mass of water expelled by poly(N-isopropylacrylamide) brushes upon thermo-induced collapse
Source: Royal Society of Chemistry journal article supplement (doi:10.1039/b903560e), 2009-01-01
Supplement: b903560e.pdf [file b903560e.pdf]

## The Nanogram Water Expelled by the Ultra-Thin Poly(N-isopropylacrylamide) Brushes upon the Thermo-induced Collapse

Hongwei Ma<sup>1\*</sup>, Long Fu<sup>2</sup>, Wei Li<sup>2</sup>, Yaozhong Zhang<sup>1</sup>, and Mingwu Li<sup>3\*</sup>

<sup>1</sup>*Suzhou Institute of Nano-Tech and Nano-Bionics, Chinese Academy of Sciences, Suzhou 215125, P. R. China,* <sup>2</sup>*Department of Biomedical Engineering, College of Engineering, Peking University, Beijing 100871, P. R. China,* <sup>3</sup>*Department of Ophthalmology, People's Hospital, Affiliated Peking University, Beijing 100044, P. R. China*

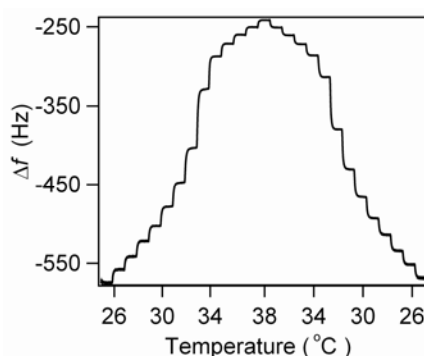

Figure S1. A representative temperature scan for ~32.5 nm pNIPAM in water. Temperature was conducted in a step by step mode. Starting from 25 °C and ending at 38 °C, we increased 1 °C at each step, which was kept for 20 min to achieve equilibrium.

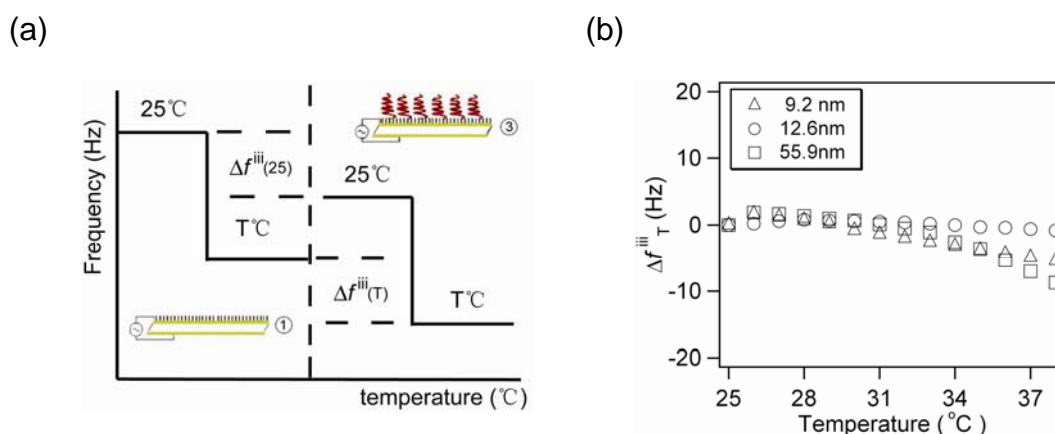

Figure S2. Control experiments of dry pNIPAM under temperature scan. (a) definitions of frequency changes,  $\Delta f^{\text{iii}}$  is the frequency difference between the SAM modified QCM chip and pNIPAM modified QCM chip at 25 °C;  $\Delta f^{\text{iii}}(T)$  is the frequency difference between the SAM modified QCM chip and pNIPAM modified QCM chip at T °C; (b) dry pNIPAM of three thicknesses had negligible frequency changes as temperature changed.

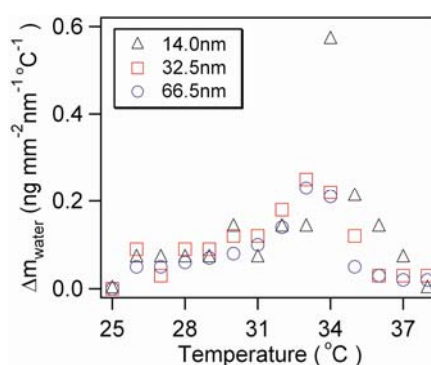

Figure S3. The mass of expelled water for 1 °C change per nm of dry pNIPAM was plotted against temperature. For the starting point of 25 °C, the change was zero. For 26 °C, the change was the value at 25 °C minus the value at 26 °C and was plotted against 26 °C. From the thickness averaged  $\Delta m$  values, thin films had a more dramatic change. Detailed studies are currently undergoing.

Table S1. The full list of  $k_{1,n,t}$  at all tested temperatures.

| T(°C)       | 25    | 26    | 27    | 28    | 29    | 30    | 31    | 32   | 33   | 34   | 35   | 36   | 37   | 38   |
|-------------|-------|-------|-------|-------|-------|-------|-------|------|------|------|------|------|------|------|
| $K_{1,n,a}$ | 14.4  | 13.7  | 13.4  | 12.9  | 12.4  | 11.8  | 11.1  | 10.6 | 8.3  | 7.4  | 6.1  | 5.8  | 5.6  | 6.2  |
| $R^2$       | 0.995 | 0.996 | 0.995 | 0.996 | 0.995 | 0.993 | 0.991 | 0.98 | 0.93 | 0.91 | 0.91 | 0.91 | 0.92 | 0.91 |
